# Supplementary material
Source: Springer Nature journal article supplement (https://www.springermedizin.de/resource/supplementary/12911_2005_103_MOESM6_ESM.pdf/9527132)

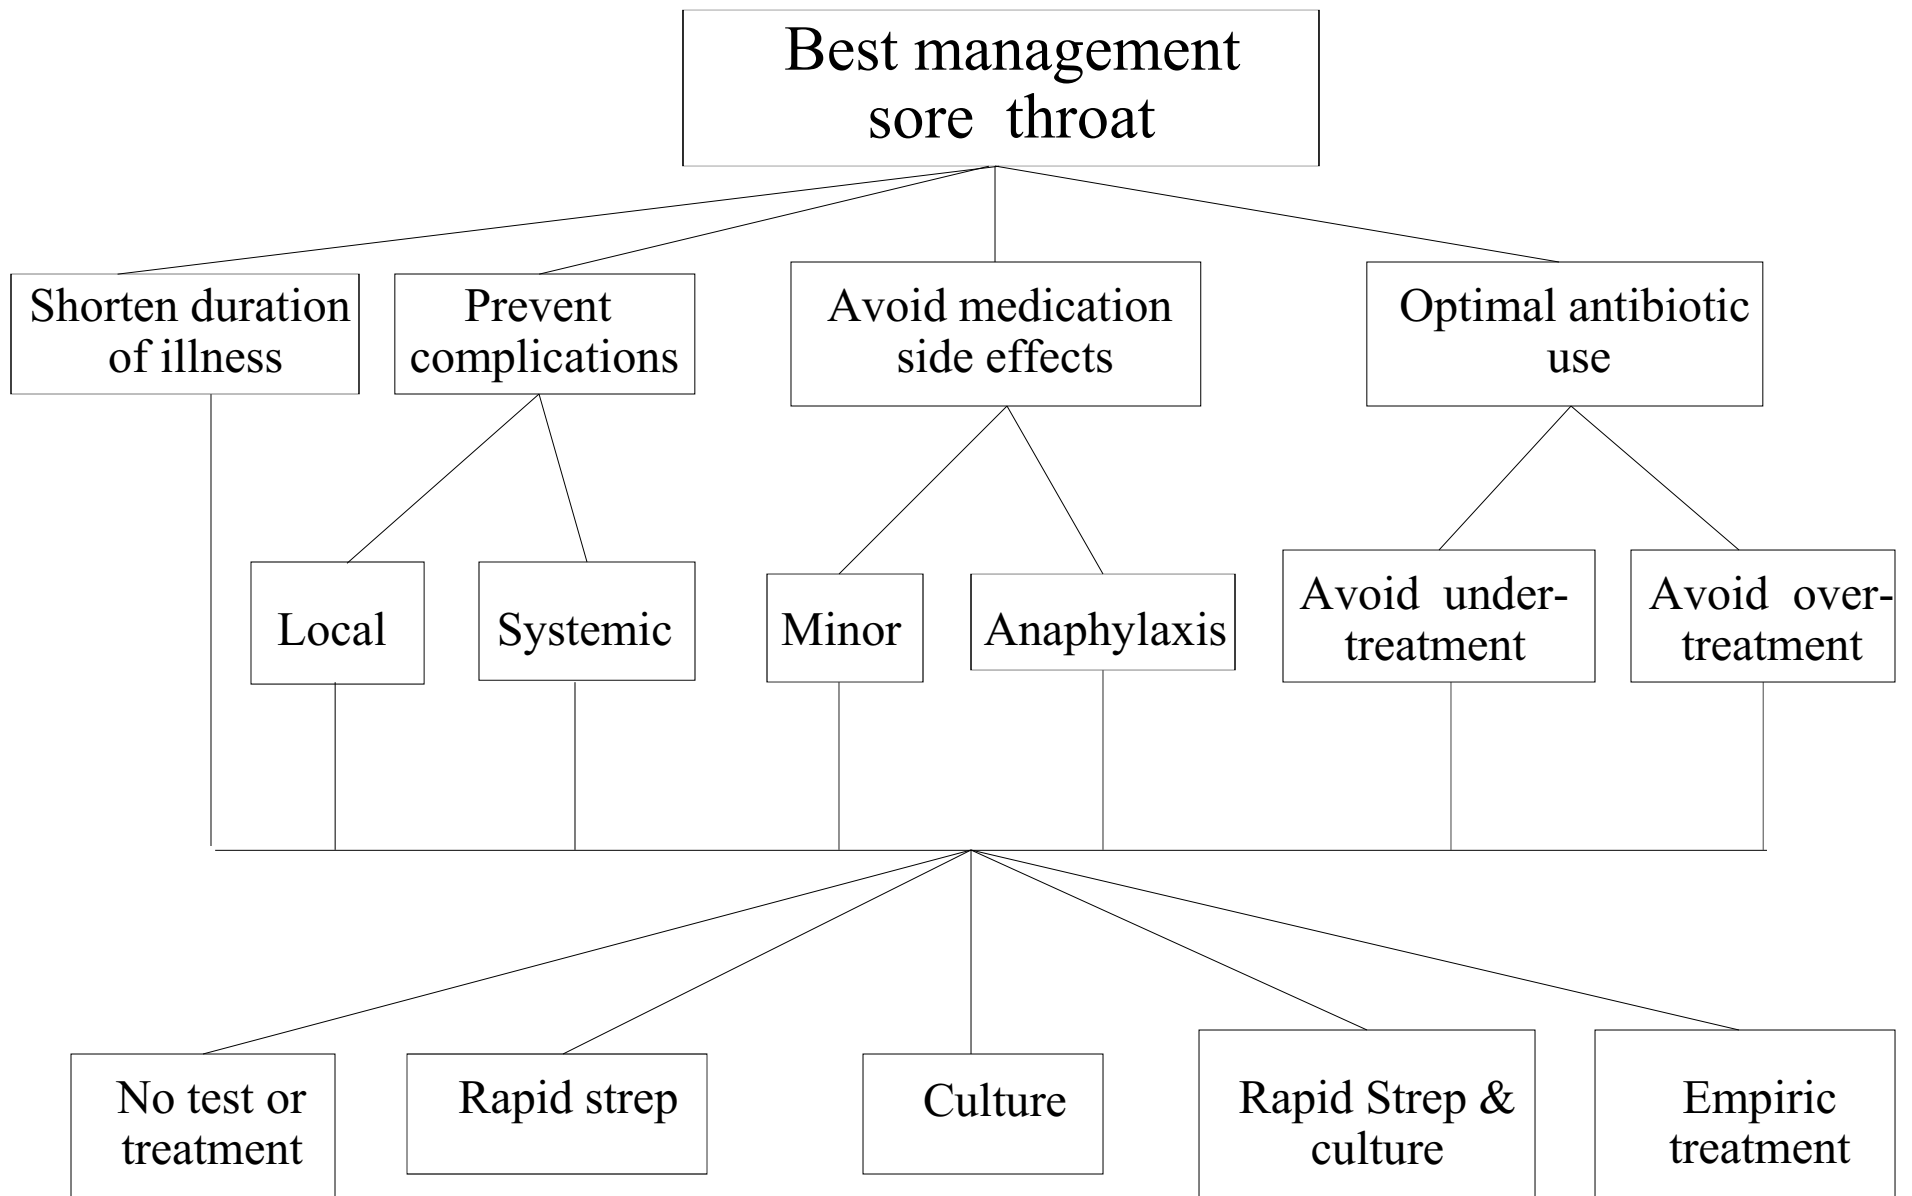

Supplement: MOESM6 [file 9527132]
